# Supplementary material for: Does Using Corsi–Rosenthal Boxes to Mitigate COVID-19 Transmission Also Reduce Indoor Air Concentrations of PFAS and Phthalates?
Source: PubMed Central journal article supplement — Environ Sci Technol. 2022 Dec 23;57(1):415–27. doi: 10.1021/acs.est.2c05169 (PMC9876422; doi:10.1021/acs.est.2c05169), 2022-12-23
Supplement: es2c05169_si_001.pdf [file es2c05169_si_001.pdf]

**Supplemental Material For:** Does Using Corsi-Rosenthal Boxes to Mitigate COVID-19 Transmission Also Reduce Indoor Air Concentrations of PFAS and Phthalates?

**Authors:** Robin E. Dodson, Katherine E. Manz, Shaunessey Burks, Richa Gairola, Nina F. Lee, Yun Liu, Kurt D. Pennell, Erica Walker, Joseph M. Braun\*

**\*Corresponding Author:**

Joseph M. Braun  
Department of Epidemiology  
Brown University  
Box G-S121(2)  
Providence, RI 02912  
joseph\_braun\_1@brown.edu

**Contents**

Supplemental Methods-Analytic Chemistry Methods..... 3

Supplemental Table 1: Calculated equivalent air exchanges per hour provided by Corsi-Rosenthal boxes. .... 7

Supplemental Table 2: Full names, abbreviations, and classes of environmental chemicals included in the present study..... 8

Supplemental Table 3: Retention time, quantification ion, and confirming ions used in targeted PFAS analysis. .... 10

Supplemental Table 5: PFAS analytes, their method limit of detection (LOD), blank concentrations, and technical replicate concentrations (ng/L).<sup>a</sup> ..... 13

Supplemental Table 6: SVOC analytes, their method limit of detection (LOD), blank concentrations, and technical replicate concentrations (µg/L)<sup>a</sup> ..... 15

Supplemental Table 7: Recovery of SVOCs analytes from standards spiked into an XAD and PUF sample (n=5). .... 16

Supplemental Table 8: Recovery of PFAS analytes from standards spiked into an XAD and PUF sample (n=5). .... 17

Supplemental Table 9: PFAS concentrations (ng PFAS/g of filter) on unused and used box air filter pieces (location of piece from filter noted).<sup>a</sup> ..... 19

Supplemental Table 10: SVOC concentrations (ng chemical/g of filter) on unused and used box air filter pieces (location of piece from filter noted).<sup>a</sup> ..... 21

Supplemental Figure 1: Representative image of an assembled Corsi-Rosenthal box used in the intervention study..... 22

Supplemental Figure 2: Representative image of disassembled (Left) and assembled (Right) SVOC sampling devices. .... 23

Supplemental Figure 3: Representative image of air sampling device..... 24

Supplemental Figure 4: PFAS concentrations (ng/L or ppt) in solvent extracts, field blanks, and field sample extracts. .... 25

Supplemental Figure 5: SVOC concentrations (µg/L or ppb) in solvent extracts, field blanks, and field sample extracts. .... 26

Supplemental Figure 6. Associations of log- $K_{oa}$  and molecular weight with change in room phthalate and PFAS air concentrations before vs. during the intervention<sup>a</sup> ..... 27

Instructions for Supplemental Files – Interactive Plots ..... 29

## Supplemental Methods-Analytic Chemistry Methods

The PUF and XAD powder were extracted with three 10-mL (30 mL total) washes of acetonitrile. The acetonitrile supernatant was collected in a separate 50 mL glass centrifuge tube. A 1 mL volume of the supernatant was collected for analyses of PFAS and other SVOCs. The fraction used for PFAS analysis was transferred to a HDPE vial, while the fraction for other SVOC analysis was transferred to a glass vial. Each fraction was spiked with a surrogate solution containing isotopically labeled PFAS or phthalate standards. The fraction was then reduced to a final volume (300  $\mu$ L for PFAS and 150  $\mu$ L for SVOCs) using a Organomation 30 position Multivap Nitrogen Evaporator (Organomation Associates Inc.). The final extract was transferred to an amber autosampler vial containing a 250  $\mu$ L glass insert and sealed with a cap. The extract used for gas-chromatography (GC) analysis was spiked with 10  $\mu$ l of an internal standard solution containing 62.5  $\mu$ g/L of phenanthrene D-10 and chrysene D-12 and retention time marker.

Certified reference standards used for quantitation of PFAS and corresponding isotope labeled standards were purchased from Wellington Laboratories (Overland Park, KS, USA) (all analytes listed in Table 1). Ammonium acetate solution (5 M, LC-MS grade) was purchased from Sigma-Aldrich (St. Louis, MO, USA). Ultrapure water (UHPLC-MS grade) and acetonitrile (UHPLC-MS grade) were purchased from Thermo Fisher Scientific (Waltham, MA, USA). Certified reference standards for SVOCs (purity  $\geq$ 97%) were obtained from AccuStandard (New Haven, CT, USA), with the exception of Benzophenone, Tonalid, and Galaxolide, which were purchased from Millipore Sigma (St. Louis, MO). Surrogate standards (five isotope labeled phthalates, listed in Table 2), internal standard mix (Phenanthrene-d10 and Chrysene-d12), and Carbon Distribution Marker (retention time marker) were also purchased from AccuStandard.

PFAS were measured based on EPA Draft Method 1633 using a high resolution Thermo QExactive HF-X Orbitrap MS equipped with a Vanquish ultra-high-performance liquid chromatograph (UHPLC-Orbitrap-HRMS). A 20  $\mu$ L volume of each sample was injected on the UHPLC instrument. Sample components were separated using Thermo Hypersil Gold Vanquish C18 column (50 mm X 2.1 mm x 1.9  $\mu$ m) at 40°C. The mobile phase A consisted of 2 mM ammonium acetate in 5% acetonitrile and the mobile phase B consisted of 2 mM ammonium acetate in 100% acetonitrile. The separation of analytes was achieved at a flow rate of 0.4 mL/min using the following solvent gradient program (Figure 1): 2% B for 0.2 min, increase to 30% B until 4 minutes using a gradient curve of 6, increase to 55% B until 7 minutes using a gradient curve of 8, increase to 55% B until 9 minutes using a gradient curve of 8, increase to 75% B until 9 minutes using a gradient curve of 8, increase to 98% B until 10 minutes using a gradient curve of 5, hold at 98% B until 11 minutes using a gradient curve of 6, and decrease over 1 minutes to the initial conditions for equilibration and hold for 3 minutes. The total run time was 15 minutes. The acquisitions were performed with Full MS-ddMS2 (stepped 20, 30, and 40 normalized collision energy) with an inclusion list for 63 PFAS and internal standards (Supplemental Table 3). The scan range used was 100-1500 m/z. Ionization was performed in negative mode with an ionization window of 1.0 m/z, sheath gas flow rate of 40, auxiliary gas flow rate of 10, sweep gas flow rate of 2, spray voltage of 2.7 kV, 310°C capillary temperature, funnel RF level of 35, and 320°C auxiliary gas heater temperature. For the full-scan, the Orbitrap was operated with a resolution of 120,000, automatic gain control (AGC) of  $3 \times 10^6$ , and maximum dwell time of 100ms. For dd-MS2, the Orbitrap was operated with a resolution of 15,000, AGC of  $2 \times 10^5$ , and maximum dwell time of 400ms. MS2 fragmentation was performed

in the HCD collision cell filled with N<sub>2</sub> gas (produced by a Peak Scientific Nitrogen Generator, Genius NM32LA).

Quantification was performed using one quantification ion and eight-point calibration curves. Compound confirmation was performed using retention time and two confirming ions when available. The LODs ranged between 0.024-3.91 ng (Supplemental Table 1) and were determined from seven injections of calibration standards and the equation:

$$\text{LOD} = (t \cdot s) / m \quad (\text{Equation 1})$$

where  $t$  is the student's  $t$  value for a 99% confidence level with  $n-1$  degrees freedom ( $t=3.14$ ),  $s$  is the standard deviation of the mean, and  $m$  is the slope of the calibration curve.<sup>29, 30</sup>

Sample extracts were analyzed for other SVOC concentrations using a high-resolution Thermo Q Exactive Orbitrap MS equipped with a Thermo Trace 1300 GC and a TriPlus RSH Autosampler. Helium (99.9999% purity) and nitrogen (99.999% purity) were used as the carrier and c-trap gases, respectively. Sample extracts (2  $\mu\text{L}$ ) were injected into a 290°C split/splitless inlet operated in split-less mode. Analytes were separated on a Restek Rxi-35Sil MS column (30 m x 0.25 mm inner diameter x 0.25  $\mu\text{m}$  film thickness) column with a 1 mL/min carrier gas flow rate. The transfer line was maintained at 300°C while the oven temperature ramp began at 40°C for 0.5 min, increased 7°C/min to 150°C and held for 10 minutes, and finally 10°C/min increased to 350°C and held for 7 min, with a 53 min total run time. The source temperature was 230°C and the MS scan range was 50 to 750  $m/z$ . The MS instrument was operated in electron ionization (EI) mode (70 eV). Data were collected in full-scan mode (ranges listed below) with 60,000 resolution and  $1 \times 10^6$  automatic gain control. The extracted ion chromatogram (XIC) was used for quantification using the most abundant peak in the mass spectrum. Analyte identity was confirmed using the two confirming ions ratios and retention time (Supplemental Table 4).

Quantification for both methods was performed using eight-point calibration curve prepared by serial dilution of calibration standards in hexane (0.061 to 4.07 ng).

Supplemental Table 1: Calculated equivalent air exchanges per hour provided by Corsi-Rosenthal boxes.

| <b>Room</b> | <b>Volume (ft<sup>2</sup>)</b> | <b>Number of CR-Boxes</b> | <b>Equivalent ACH</b> |
|-------------|--------------------------------|---------------------------|-----------------------|
| 200         | 1,800                          | 1                         | 17.0                  |
| 241         | 7,870                          | 2                         | 7.8                   |
| 245         | 10,080                         | 3                         | 9.1                   |
| 247         | 8,760                          | 2                         | 7.0                   |
| 251         | 4,720                          | 1                         | 6.5                   |
| 259         | 3,400                          | 1                         | 9.0                   |
| 331         | 7,920                          | 2                         | 7.7                   |
| 347         | 2,190                          | 1                         | 14.0                  |
| 374         | 3,000                          | 1                         | 10.2                  |
| 375         | 10,840                         | 3                         | 8.5                   |
| 408         | 5,490                          | 1                         | 5.6                   |
| 431         | 2,450                          | 1                         | 12.5                  |
| 504         | 2,840                          | 1                         | 10.8                  |
| 625         | 2,950                          | 1                         | 10.4                  |
| 636         | 2,820                          | 1                         | 10.9                  |
| 700         | 2,760                          | 1                         | 11.1                  |
| 754         | 1,570                          | 1                         | 19.5                  |
| 821         | 3,810                          | 1                         | 8.0                   |

Equivalent ACH = Number of Cubes x CADR x 60 / Volume of Room

Supplemental Table 2: Full names, abbreviations, and classes of environmental chemicals included in the present study

| <b>Chemical Name</b>                                | <b>Abbreviation</b> | <b>Class</b>                              |
|-----------------------------------------------------|---------------------|-------------------------------------------|
| 11-chloroeicosafluoro-3-oxaundecane-1-sulfonic acid | 11Cl-PF3OUdS        | Ether Sulfonic Acid                       |
| 9-Chlorohexadecafluoro-3-oxanonane-1-sulfonic acid  | 9Cl-PF3ONS          | Ether Sulfonic Acid                       |
| Perfluoro(2-ethoxyethane) sulfonic acid             | PFEESA              | Ether Sulfonic Acid                       |
| Perfluorooctanoic acid                              | 3:3 FTCA            | Fluorotelomer Carboxylic Acids            |
| 2H,2H,3H,3H-Perfluorooctanoic acid                  | 5:3 FTCA            | Fluorotelomer Carboxylic Acids            |
| 2H,2H,3H,3H-Perfluorodecanoic acid                  | 7:3 FTCA            | Fluorotelomer Carboxylic Acids            |
| 1H,1H, 2H, 2H-Perfluorohexane sulfonic acid         | 4:2-FTS             | Fluorotelomer Sulfonic Acids              |
| 1H,1H, 2H, 2H-Perfluorooctane sulfonic acid         | 6:2-FTS             | Fluorotelomer Sulfonic Acids              |
| 1H,1H, 2H, 2H-Perfluorodecane sulfonic acid         | 8:2-FTS             | Fluorotelomer Sulfonic Acids              |
| 4,8-Dioxa-3H-perfluorononanoic acid                 | ADONA               | Per- and Polyfluoroether Carboxylic Acids |
| Hexafluoropropylene oxide-dimer acid                | HFPODA-GenX         | Per- and Polyfluoroether Carboxylic Acids |
| Perfluoro-3,6-dioxaheptanoic acid                   | NFDHA               | Per- and Polyfluoroether Carboxylic Acids |
| Perfluoro-4-methoxybutanoic acid                    | PFMBA               | Per- and Polyfluoroether Carboxylic Acids |
| Perfluoro-3-methoxypropanoic acid                   | PFMPA               | Per- and Polyfluoroether Carboxylic Acids |
| Perfluorobutanesulfonamide                          | FBSA                | Perfluoroalkane Sulfonamide               |
| Perfluorohexanesulfonamide                          | FHxSA               | Perfluoroalkane Sulfonamide               |
| Perfluorobutanoic acid                              | PFBA                | Perfluoroalkyl Carboxylic Acid            |
| Perfluorodecanoic acid                              | PFDA                | Perfluoroalkyl Carboxylic Acid            |
| Perfluorododecanoic acid                            | PFDoA               | Perfluoroalkyl Carboxylic Acid            |
| Perfluoroheptanoic acid                             | PFHpA               | Perfluoroalkyl Carboxylic Acid            |
| Perfluorohexanoic acid                              | PFHxA               | Perfluoroalkyl Carboxylic Acid            |
| Perfluorononanoic acid                              | PFNA                | Perfluoroalkyl Carboxylic Acid            |
| Perfluorooctanoic acid                              | PFOA                | Perfluoroalkyl Carboxylic Acid            |
| Perfluoropentanoic acid                             | PFPeA               | Perfluoroalkyl Carboxylic Acid            |
| Perfluorotetradecanoic acid                         | PFTeDA              | Perfluoroalkyl Carboxylic Acid            |
| Perfluorotridecanoic acid                           | PFTrDA              | Perfluoroalkyl Carboxylic Acid            |
| Perfluoroundecanoic acid                            | PFUnA               | Perfluoroalkyl Carboxylic Acid            |
| Perfluorobutanesulfonic acid                        | PFBS                | Perfluoroalkyl Sulfonic Acid              |
| Perfluorododecanesulfonic acid                      | PFDoS               | Perfluoroalkyl Sulfonic Acid              |
| Perfluorodecanesulfonic acid                        | PFDS                | Perfluoroalkyl Sulfonic Acid              |
| Perfluoroheptanesulfonic acid                       | PFHpS               | Perfluoroalkyl Sulfonic Acid              |
| Perfluorohexanesulfonic acid                        | PFHxS               | Perfluoroalkyl Sulfonic Acid              |
| Perfluoronanesulfonic acid                          | PFNS                | Perfluoroalkyl Sulfonic Acid              |



| <b>Chemical Name</b>                            | <b>Abbreviation</b> | <b>Class</b>                            |
|-------------------------------------------------|---------------------|-----------------------------------------|
| Perfluorooctanesulfonic acid                    | PFOS                | Perfluoroalkyl Sulfonic Acid            |
| Perfluoropentanesulfonic acid                   | PFPeS               | Perfluoroalkyl Sulfonic Acid            |
| N-Ethylperfluorooctanesulfonamidoethanol        | NEtFOSE             | Perfluorooctane Sulfonamide Ethanol     |
| N-Methylperfluorooctanesulfonamidoethanol       | NMeFOSE             | Perfluorooctane Sulfonamide Ethanol     |
| N-Ethylperfluorooctanesulfonamide               | NEtFOSA             | Perfluorooctane Sulfonamides            |
| N-Methylperfluorooctanesulfonamide              | NMeFOSA             | Perfluorooctane Sulfonamides            |
| Perfluorooctanesulfonamide                      | PFOSA               | Perfluorooctane Sulfonamides            |
| N-Ethyl perfluorooctane sulfonamidoacetic acid  | NEtFOSAA            | Perfluorooctane Sulfonamidoacetic Acids |
| N-Methyl perfluorooctane sulfonamidoacetic acid | NMeFOSAA            | Perfluorooctane Sulfonamidoacetic Acids |
| Brominated diphenyl ether 47                    | BDE 47              | Brominated Flame Retardant              |
| Brominated diphenyl ether 99                    | BDE 99              | Brominated Flame Retardant              |
| Brominated diphenyl ether 100                   | BDE 100             | Brominated Flame Retardant              |
| Benzophenone                                    | BP                  | Phenol                                  |
| Benzophenone-3                                  | BP3                 | Phenol                                  |
| Benzyl butyl phthalate                          | BBzP                | Phthalate                               |
| Bis(2-ethylhexyl) adipate                       | DEHA                | Phthalate                               |
| Bis(2-ethylhexyl) phthalate                     | DEHP                | Phthalate                               |
| Dibutyl phthalate                               | DnBP                | Phthalate                               |
| Dicyclohexyl phthalate                          | DCHP                | Phthalate                               |
| Diethyl Phthalate                               | DEP                 | Phthalate                               |
| Dihexyl phthalate                               | DHP                 | Phthalate                               |
| Diisobutyl phthalate                            | DiBP                | Phthalate                               |
| Diisononyl phthalate                            | DiNP                | Phthalate                               |
| Dimethyl phthalate                              | DMP                 | Phthalate                               |
| Di-n-octyl phthalate                            | DnOP                | Phthalate                               |
| Di-n-pentyl phthalate                           | DNPP                | Phthalate                               |
| Galaxolide/Tonalid                              | Gal/Ton             | Synthetic Musk                          |
| Polychlorinated biphenyl 52                     | PCB 52              | PCB                                     |
| Polychlorinated biphenyl 105                    | PCB 105             | PCB                                     |
| Polychlorinated biphenyl 153                    | PCB 153             | PCB                                     |
| Tri(2-chloroethyl) phosphate                    | TCEP                | Organophosphate Ester                   |
| Triphenyl phosphate                             | TPP                 | Organophosphate Ester                   |
| Tris(1,3-Dichloro-2-propyl) phosphate           | TDCPP               | Organophosphate Ester                   |
| Tris(1-chloro-2-propyl)phosphate                | TCPP                | Organophosphate Ester                   |

Supplemental Table 3: Retention time, quantification ion, and confirming ions used in targeted PFAS analysis.

| PFAS               | Internal Standard | Retention Time (min) | Quantification Ion<br>m/z | Confirming Ion 1<br>m/z | Confirming Ion 2<br>m/z |
|--------------------|-------------------|----------------------|---------------------------|-------------------------|-------------------------|
| 11CI-PF3OUdS       | 13C3-HFPO-        | 9.79                 | 630.8892                  | 450.9                   | 452.9                   |
| 3:3 FTCA           | 13C5-PFPeA        | 6.8                  | 241.0105                  | 177.0                   | 117.0                   |
| 4:2-FTS            | 13C2-4:2 FTS      | 5.37                 | 326.9743                  | 307.0                   | -                       |
| 5:3 FTCA           | 13C5-PFHxA        | 8.22                 | 341.0041                  | 237.1                   | 217.0                   |
| 6:2-FTS            | 13C2-6:2 FTS      | 7.42                 | 426.9679                  | 407.0                   | -                       |
| 7:3 FTCA           | 13C5-PFHxA        | 9.33                 | 440.9977                  | 316.9                   | 336.9                   |
| 8:2-FTS            | 13C2-8:2 FTS      | 8.16                 | 526.9615                  | 507.0                   | -                       |
| 9CI-PF3ONS         | 13C3-HFPO-        | 8.91                 | 530.8956                  | 351.0                   | 353.0                   |
| ADONA              | 13C3-HFPO-        | 7.28                 | 376.9689                  | 250.9                   | -                       |
| FBSA               | -                 | 7.42                 | 297.959                   | -                       | -                       |
| FHxSA              | -                 | 8.45                 | 397.9526                  | -                       | -                       |
| HFPODA-GenX        | 13C3-HFPO-        | 6.11                 | 284.9783                  | 168.9                   | 184.9                   |
| NEtFOSA            | D5-NEtFOSA        | 10.07                | 525.9774                  | 219.0                   | 169.0                   |
| NEtFOSAA           | D5-               | 9.88                 | 583.983                   | 419.1                   | 526.0                   |
| NEtFOSE            | D9-NEtFOSE        | 10.01                | 630.0249                  | -                       | -                       |
| NFDHA              | 13C5-PFHxA        | 5.58                 | 294.9658                  | 201.0                   | -                       |
| NMeFOSA            | D3-NMeFOSA        | 9.92                 | 511.9619                  | 219.0                   | 169.0                   |
| NMeFOSAA           | D3-               | 9.71                 | 569.9673                  | 419.0                   | 483.0                   |
| NMeFOSE            | D7-NMeFOSE        | 10.01                | 616.0092                  | -                       | -                       |
| PFBA               | 13C4-PFBA         | 0.49                 | 212.9792                  | 168.9                   | -                       |
| PFBS               | 13C3-PFBS         | 5.67                 | 298.943                   | -                       | -                       |
| PFDA               | 13C6-PFDA         | 8.38                 | 512.96                    | 469.0                   | 219.0                   |
| PFDoA              | 13C2-PFDoA        | 9.4                  | 612.9537                  | 569.0                   | 319.0                   |
| PFDoS              | 13C8-PFOS         | 10.05                | 698.9174                  | -                       | -                       |
| PFDS               | 13C8-PFOS         | 9.58                 | 598.9238                  | -                       | -                       |
| PFEEESA            | 13C5-PFHxA        | 6.29                 | 314.9379                  | 134.9                   | -                       |
| PFHpA              | 13C4-PFHpA        | 6.92                 | 362.9696                  | 319.0                   | 169.0                   |
| PFHpS              | 13C8-PFOS         | 8.1                  | 448.9334                  | -                       | -                       |
| PFHxA              | 13C3-PFHxS        | 5.71                 | 312.9728                  | 269.0                   | 118.9                   |
| PFHxS              | 13C5-PFHxA        | 7.72                 | 398.9366                  | -                       | -                       |
| PFMBA              | 13C5-PFPeA        | 5.02                 | 278.9709                  | -                       | -                       |
| PFMPA              | 13C5-PFPeA        | 4.02                 | 228.9741                  | -                       | -                       |
| PFNA               | 13C9-PFNA         | 7.98                 | 462.9632                  | 419.0                   | 219.0                   |
| PFNS               | 13C8-PFOS         | 9.09                 | 548.927                   | -                       | -                       |
| PFOA               | 13C8-PFOA         | 7.63                 | 412.9664                  | 369.0                   | 169.0                   |
| PFOS               | 13C8-PFOS         | 8.55                 | 498.9302                  | -                       | -                       |
| PFOSA              | 13C8-PFOSA        | 9.53                 | 497.9462                  | -                       | 478.0                   |
| PFPeA              | 13C5-PFPeA        | 4.77                 | 262.976                   | 219.0                   | -                       |
| PFPeS              | 13C3-PFHxS        | 7.02                 | 348.9398                  | -                       | -                       |
| PFTeDA             | 13C2-PFTeDA       | 9.99                 | 712.9473                  | 669.0                   | 168.9                   |
| PFTTrDA            | average of        | 9.76                 | 662.9505                  | 619.0                   | 168.9                   |
| PFUnA              | 13C7-PFUnA        | 8.88                 | 562.9568                  | 519.0                   | 269.1                   |
| Internal Standards |                   |                      |                           |                         |                         |

| PFAS         | Internal Standard | Retention Time (min) | Quantification Ion<br>m/z | Confirming Ion 1<br>m/z | Confirming Ion 2<br>m/z |
|--------------|-------------------|----------------------|---------------------------|-------------------------|-------------------------|
| 13C4-PFBA    | -                 | 0.49                 | 216.9928                  | 172.0                   | -                       |
| 13C5-PFPeA   | -                 | 4.77                 | 267.9927                  | -                       | -                       |
| 13C5-PFHxA   | -                 | 5.71                 | 317.9891                  | 270.0                   | 119.4                   |
| 13C4-PFHpA   | -                 | 6.92                 | 366.9827                  | -                       | -                       |
| 13C8-PFOA    | -                 | 7.84                 | 420.993                   | 172.0                   | -                       |
| 13C9-PFNA    | -                 | 7.98                 | 471.9932                  | 423.0                   | -                       |
| 13C6-PFDA    | -                 | 8.38                 | 518.98                    | 427.0                   | -                       |
| 13C7-PFUnA   | -                 | 8.86                 | 569.9805                  | 474.1                   | -                       |
| 13C2-PFDoA   | -                 | 9.4                  | 614.9607                  | 570.0                   | -                       |
| 13C2-PFTeDA  | -                 | 9.99                 | 714.9546                  | 670.0                   | -                       |
| 13C3-PFBS    | -                 | 5.67                 | 301.9522                  | -                       | -                       |
| 13C3-PFHxS   | -                 | 7.72                 | 401.9458                  | -                       | -                       |
| 13C8-PFOS    | -                 | 8.55                 | 506.9568                  | -                       | -                       |
| 13C2-4:2 FTS | -                 | 5.37                 | 328.9813                  | -                       | 309.0                   |
| 13C2-6:2 FTS | -                 | 7.42                 | 428.9749                  | -                       | 409.0                   |
| 13C2-8:2 FTS | -                 | 8.16                 | 528.9617                  | -                       | 509.0                   |
| 13C8-PFOA    | -                 | 9.54                 | 505.9731                  | -                       | -                       |
| D3-NMeFOSAA  | -                 | 9.71                 | 572.9862                  | 419.0                   | -                       |
| D5-NEtFOSAA  | -                 | 9.88                 | 589.0148                  | 419.0                   | -                       |
| D3-NMeFOA    | -                 | 9.92                 | 514.9806                  | 219.0                   | -                       |
| D5-NEtFOA    | -                 | 10.07                | 531.009                   | 219.0                   | -                       |
| D7-NMeFOSE   | -                 | 10.01                | 623.0016                  | -                       | -                       |
| D9-NEtFOSE   | -                 | 10.01                | 638.7986                  | -                       | -                       |
| 13C3-HFPO-DA | -                 | 6.11                 | 284.9782                  | -                       | -                       |

Supplemental Table 4: Retention time, Quantification ion, and confirming ions used in targeted SVOC analysis.

| SVOC                                                | Retention Time (min) | Quantification Ion m/z | Confirming Ion 1 m/z | Confirming Ion 2 m/z |
|-----------------------------------------------------|----------------------|------------------------|----------------------|----------------------|
| BDE 100                                             | 42.42                | 403.7868               | 201.9                | 405.8                |
| BDE 47                                              | 40.31                | 325.8761               | 323.9                | 327.9                |
| BDE 99                                              | 41.95                | 403.7868               | 405.8                | 202.9                |
| Benzophenone                                        | 28.04                | 105.0336               | 182.1                | 77.0                 |
| Benzophenone-3                                      | 31.55                | 227.0702               | 228.1                | 151.0                |
| Benzyl butyl phthalate                              | 38.47                | 149.0232               | 91.1                 | 150.0                |
| Bis(2-ethylhexyl) adipate                           | 37.13                | 111.0442               | 129.1                | 101.1                |
| Bis(2-ethylhexyl) phthalate                         | 39.84                | 149.0232               | 167.0                | 150.0                |
| Dibutyl phthalate                                   | 33.79                | 149.0232               | 150.0                | 121.0                |
| Dicyclohexyl phthalate                              | 38.91                | 149.0232               | 167.0                | 150.0                |
| Diethyl Phthalate                                   | 25.43                | 149.0232               | 150.0                | 177.0                |
| Dihexyl phthalate                                   | 37.54                | 149.0232               | 150.0                | 151.0                |
| Diisobutyl phthalate                                | 32.28                | 149.0232               | 150.0                | 151.0                |
| Diisononyl phthalate                                | 42.74                | 149.0233               | 150.0                | 293.0                |
| Dimethyl phthalate                                  | 20.04                | 163.0391               | 150.0                | 194.0                |
| Di-n-octyl phthalate                                | 40.52                | 149.0232               | 150.0                | 279.0                |
| Di-n-pentyl phthalate                               | 35.84                | 149.0233               | 150.0                | 151.0                |
| Galoxolide/Tonalid                                  | 31.57                | 243.1746               | 159.1                | 187.1                |
| PCB 105                                             | 38.14                | 325.8800               | 327.9                | 323.9                |
| PCB 153                                             | 37.65                | 359.8413               | 289.9                | 361.8                |
| PCB 52                                              | 33.83                | 219.9841               | 289.9                | 291.9                |
| Tri(2-chloroethyl) phosphate (TCEP)                 | 32.02                | 142.9661               | 99.0                 | 117.0                |
| Triphenyl phosphate (TPP)                           | 39.25                | 325.0626               | 169.1                | 326.1                |
| Tris(1,3-Dichloro-2-propyl) phosphate (TDCPP, TDCP) | 38.22                | 98.9843                | 190.9                | 75.0                 |
| Tris(1-chloro-2-propyl)phosphate (TCPP)             | 31.66                | 125.0000               | 117.0                | 99.0                 |
| Internal Standards                                  |                      |                        |                      |                      |
| Diethyl Phthalate-3,4,5,6-d4                        | 25.3                 | 153.0484               | -                    | -                    |
| Diisobutyl Phthalate-3,4,5,6-d4                     | 32.23                | 153.0484               | -                    | -                    |
| Di-n-pentyl phthalate-3,4,5,6-d4                    | 35.8                 | 153.0484               | -                    | -                    |
| Di-n-hexyl Phthalate-3,4,5,6-d4                     | 37.51                | 153.0484               | -                    | -                    |
| Di-n-octyl Phthalate-3,4,5,6-d4                     | 40.5                 | 153.0484               | -                    | -                    |

Supplemental Table 5: PFAS analytes, their method limit of detection (LOD), blank concentrations, and technical replicate concentrations (ng/L).<sup>a</sup>

| PFAS         | LOD    | Solvent<br>Blank 1 | Solvent<br>Blank 2 | Field<br>Blank 1 | Field<br>Blank 2 | Technical<br>Replicate 1 | Technical<br>Replicate 2 | Technical<br>Replicate 3 | Mean <sup>b</sup> | CV <sup>c</sup> |
|--------------|--------|--------------------|--------------------|------------------|------------------|--------------------------|--------------------------|--------------------------|-------------------|-----------------|
| 11Cl-PF3OUdS | 31.33  | 0.06               | <LOD               | <LOD             | <LOD             | 3.14                     | 3.45                     | 3.98                     | 3.52              | 12.0            |
| 3:3 FTCA     | 8.42   | <LOD               | <LOD               | <LOD             | <LOD             | <LOD                     | <LOD                     | <LOD                     |                   |                 |
| 4:2-FTS      | 13.39  | 0.04               | <LOD               | <LOD             | <LOD             | 1.26                     | <LOD                     | <LOD                     |                   |                 |
| 5:3 FTCA     | 7.47   | 0.18               | 0.17               | 8.96             | 7.22             | 361.17                   | 359.22                   | 286.76                   | 335.72            | 12.6            |
| 6:2-FTS      | 6.51   | <LOD               | <LOD               | <LOD             | 0.08             | 7.74                     | 6.59                     | 5.43                     | 6.59              | 17.6            |
| 7:3 FTCA     | 8.95   | <LOD               | <LOD               | <LOD             | <LOD             | <LOD                     | <LOD                     | <LOD                     |                   |                 |
| 8:2-FTS      | 5.22   | <LOD               | <LOD               | 0.03             | <LOD             | 2.25                     | 3.09                     | <LOD                     |                   |                 |
| 9Cl-PF3ONS   | 7.43   | <LOD               | 0.08               | <LOD             | <LOD             | 8.97                     | <LOD                     | <LOD                     |                   |                 |
| ADONA        | 25.06  | 0.01               | <LOD               | <LOD             | 0.40             | 6.08                     | <LOD                     | 1.54                     |                   |                 |
| FBSA         | 27.64  | 0.01               | <LOD               | 0.61             | 0.19             | 1.11                     | 1.70                     | 1.15                     | 1.32              | 25.2            |
| FHxSA        | 27.08  | 0.02               | 0.05               | 0.21             | <LOD             | 8.34                     | 8.39                     | 7.63                     | 8.12              | 5.2             |
| HFPODA-GenX  | 22.11  | <LOD               | <LOD               | <LOD             | <LOD             | <LOD                     | <LOD                     | <LOD                     |                   |                 |
| NEtFOSA      | 33.03  | 0.08               | <LOD               | 0.12             | <LOD             | 433.91                   | 749.03                   | 809.97                   | 664.31            | 30.4            |
| NEtFOSAA     | 28.87  | 0.04               | 0.09               | <LOD             | <LOD             | 1.46                     | 1.52                     | <LOD                     |                   |                 |
| NEtFOSE      | 39.01  | 1.64               | 1.04               | 20.40            | 22.20            | <LOD                     | <LOD                     | <LOD                     |                   |                 |
| NFDHA        | 7.46   | <LOD               | 0.05               | <LOD             | <LOD             | <LOD                     | <LOD                     | <LOD                     |                   |                 |
| NMeFOSA      | 20.15  | <LOD               | <LOD               | 0.62             | 0.09             | 154.01                   | 136.90                   | 141.89                   | 144.27            | 6.1             |
| NMeFOSAA     | 5.32   | 6.01               | 9.95               | 8.46             | 7.09             | 956.40                   | 1042.78                  | 1048.83                  | 1016.00           | 5.1             |
| NMeFOSE      | 8.59   | 0.41               | 0.07               | 0.19             | 0.82             | 3.37                     | 4.39                     | <LOD                     |                   |                 |
| PFBA         | 38.49  | 0.09               | 0.01               | 0.93             | 0.55             | 63.18                    | 64.50                    | 58.39                    | 62.02             | 5.2             |
| PFBS         | 11.34  | 0.06               | 0.06               | 0.26             | <LOD             | 21.63                    | 25.34                    | 22.17                    | 23.05             | 8.7             |
| PFDA         | 24.88  | 0.44               | <LOD               | <LOD             | <LOD             | 41.76                    | 66.03                    | 46.16                    | 51.31             | 25.2            |
| PFDoA        | 16.82  | <LOD               | <LOD               | <LOD             | <LOD             | 5.00                     | <LOD                     | 2.85                     |                   |                 |
| PFDoS        | 59.70  | 0.15               | 0.26               | 0.90             | 0.75             | 32.54                    | 36.39                    | 18.36                    | 29.10             | 32.6            |
| PFDS         | 7.74   | 0.04               | 0.09               | <LOD             | <LOD             | 1.19                     | 0.58                     | 1.07                     | 0.95              | 34.2            |
| PFEESA       | 7.36   | <LOD               | <LOD               | <LOD             | <LOD             | 0.57                     | 0.22                     | 0.07                     | 0.29              | 89.3            |
| PFHpA        | 434.85 | 0.02               | <LOD               | 0.06             | 0.05             | 8.99                     | 4.86                     | 2.08                     | 5.31              | 65.6            |
| PFHpS        | 188.72 | <LOD               | <LOD               | <LOD             | <LOD             | 9.49                     | 2.89                     | 4.00                     | 5.46              | 64.7            |
| PFHxA        | 104.93 | 0.51               | 0.82               | 0.78             | 0.44             | 44.96                    | 20.11                    | 37.89                    | 34.32             | 37.3            |
| PFHxS        | 10.97  | 0.22               | 0.21               | 0.43             | 0.82             | 32.78                    | 28.28                    | 34.00                    | 31.69             | 9.5             |
| PFMBA        | 4.74   | <LOD               | <LOD               | <LOD             | <LOD             | 4.73                     | 4.93                     | 4.94                     | 4.86              | 2.4             |
| PFMPA        | 12.52  | <LOD               | <LOD               | <LOD             | 0.38             | 8.33                     | 2.17                     | 1.42                     | 3.97              | 95.5            |

| <b>PFAS</b> | <b>LOD</b> | <b>Solvent<br/>Blank 1</b> | <b>Solvent<br/>Blank 2</b> | <b>Field<br/>Blank 1</b> | <b>Field<br/>Blank 2</b> | <b>Technical<br/>Replicate 1</b> | <b>Technical<br/>Replicate 2</b> | <b>Technical<br/>Replicate 3</b> | <b>Mean<sup>b</sup></b> | <b>CV<sup>c</sup></b> |
|-------------|------------|----------------------------|----------------------------|--------------------------|--------------------------|----------------------------------|----------------------------------|----------------------------------|-------------------------|-----------------------|
| PFNA        | 14.02      | 0.18                       | 0.49                       | 0.17                     | 0.36                     | 18.64                            | 17.19                            | 16.95                            | 17.59                   | 5.2                   |
| PFNS        | 44.62      | <LOD                       | <LOD                       | <LOD                     | <LOD                     | 0.94                             | 0.97                             | 1.67                             | 1.19                    | 34.6                  |
| PFOA        | 26.12      | 0.30                       | 0.16                       | 0.99                     | 0.33                     | 120.66                           | 146.84                           | 154.23                           | 140.58                  | 12.5                  |
| PFOS        | 16.38      | 0.10                       | 0.06                       | 0.72                     | 0.63                     | 161.00                           | 128.81                           | 149.45                           | 146.42                  | 11.1                  |
| PFOSA       | 8.87       | <LOD                       | 0.01                       | 0.05                     | 1.94                     | 110.14                           | 83.11                            | 83.64                            | 92.30                   | 16.7                  |
| PFPeA       | 12.03      | 0.75                       | 0.36                       | 1.03                     | 0.03                     | 44.13                            | 26.75                            | 26.04                            | 32.31                   | 31.7                  |
| PFPeS       | 2.72       | 0.06                       | 0.26                       | 0.10                     | <LOD                     | 27.86                            | 21.04                            | 20.65                            | 23.18                   | 17.5                  |
| PFTeDA      | 12.77      | 0.38                       | 0.40                       | 0.52                     | 0.16                     | 18.39                            | 18.50                            | 19.00                            | 18.63                   | 1.7                   |
| PFTTrDA     | 4.10       | <LOD                       | <LOD                       | <LOD                     | <LOD                     | 3.03                             | <LOD                             | <LOD                             |                         |                       |
| PFUnA       | 5.55       | <LOD                       | <LOD                       | <LOD                     | <LOD                     | 1.51                             | <LOD                             | <LOD                             |                         |                       |

a- We present the field/solvent blanks and technical replicates on the ng/L scale because the field and solvent blanks did not have air passed over them like the technical replicates.

b-Arithmetic average when three detectable values were available.

c-Coefficient of variation calculated as standard deviation / arithmetic average x 100, when three detectable values are available.

Supplemental Table 6: SVOC analytes, their method limit of detection (LOD), blank concentrations, and technical replicate concentrations ( $\mu\text{g/L}$ )<sup>a</sup>

| SVOC                                  | LOD   | Solvent<br>Blank 1 | Solvent<br>Blank 2 | Field<br>Blank 1 | Field<br>Blank 2 | Technical<br>Replicate 1 | Technical<br>Replicate 2 | Technical<br>Replicate 3 | Mean <sup>b</sup> | CV <sup>c</sup> |
|---------------------------------------|-------|--------------------|--------------------|------------------|------------------|--------------------------|--------------------------|--------------------------|-------------------|-----------------|
| Brominated diphenyl ether 47          | 0.027 | 0.01               | <LOD               | <LOD             | <LOD             | <LOD                     | <LOD                     | <LOD                     |                   |                 |
| Brominated diphenyl ether 99          | 0.024 | <LOD               | <LOD               | <LOD             | <LOD             | <LOD                     | <LOD                     | <LOD                     |                   |                 |
| Brominated diphenyl ether 100         | 0.042 | <LOD               | <LOD               | <LOD             | 0.053            | <LOD                     | <LOD                     | <LOD                     |                   |                 |
| Benzophenone                          | 0.086 | 0.174              | 0.224              | 0.79             | 0.024            | 5.201                    | 4.479                    | 4.856                    | 4.67              | 5.7             |
| Benzophenone-3                        | 0.182 | 0.479              | <LOD               | 0.554            | <LOD             | <LOD                     | <LOD                     | <LOD                     |                   |                 |
| Benzyl butyl phthalate                | 0.050 | <LOD               | <LOD               | <LOD             | 0.053            | <LOD                     | <LOD                     | <LOD                     |                   |                 |
| Bis(2-ethylhexyl) adipate             | 0.064 | 0.194              | 0.096              | 0.345            | 0.661            | 5.2                      | 4.666                    | 4.634                    | 4.65              | 0.5             |
| Bis(2-ethylhexyl) phthalate           | 0.054 | 0.038              | 0.071              | <LOD             | 0.025            | 1.905                    | 1.128                    | 0.99                     | 1.06              | 9.2             |
| Dibutyl phthalate                     | 0.473 | 9.321              | 5.503              | 10.04            | 9.777            | 150.544                  | 149.759                  | 164.903                  | 157.33            | 6.8             |
| Dicyclohexyl phthalate                | 0.748 | 17.712             | 13.976             | 37.643           | 35.584           | 153.378                  | 126.722                  | 140.085                  | 133.40            | 7.1             |
| Diethyl Phthalate                     | 0.620 | 13.113             | 13.182             | 22.842           | 33.066           | 298.445                  | 237.29                   | 226.823                  | 232.06            | 3.2             |
| Dihexyl phthalate                     | 0.073 | 0.015              | 0.091              | 0.071            | 0.078            | 0.323                    | 0.104                    | 0.204                    | 0.15              | 45.9            |
| Diisobutyl phthalate                  | 0.103 | 5.185              | 3.657              | 6.503            | 14.714           | 282.942                  | 267.169                  | 257.919                  | 262.54            | 2.5             |
| Diisononyl phthalate                  | 0.094 | <LOD               | <LOD               | <LOD             | <LOD             | <LOD                     | <LOD                     | <LOD                     |                   |                 |
| Dimethyl phthalate                    | 0.217 | 1.235              | 2.69               | 0.505            | <LOD             | 17.51                    | 15.441                   | 14.408                   | 14.92             | 4.9             |
| Di-n-octyl phthalate                  | 0.539 | <LOD               | <LOD               | <LOD             | <LOD             | 30.95                    | 25.6                     | 28.7                     | 27.15             | 8.1             |
| Di-n-pentyl phthalate                 | 0.570 | 12.235             | 10.519             | 19.875           | 12.546           | 193.179                  | 153.676                  | 174.437                  | 164.06            | 8.9             |
| Galaxolide/Tonalid                    | 0.516 | 0.023              | 0.045              | 0.079            | 0.033            | 0.974                    | 1.171                    | 1.092                    | 1.13              | 4.9             |
| Polychlorinated biphenyl 52           | 0.014 | 0.003              | 0.022              | <LOD             | <LOD             | 2.106                    | 2.178                    | 1.848                    | 2.01              | 11.6            |
| Polychlorinated biphenyl 105          | 0.403 | 0.006              | <LOD               | <LOD             | 0.006            | <LOD                     | 0.016                    | 0.021                    | 0.02              | 19.1            |
| Polychlorinated biphenyl 153          | 0.016 | 0.08               | 0.036              | <LOD             | <LOD             | 0.029                    | 0.056                    | <LOD                     |                   |                 |
| Tri(2-chloroethyl) phosphate          | 0.028 | <LOD               | <LOD               | 0.016            | 0.036            | 0.211                    | 0.146                    | 0.216                    | 0.18              | 27.3            |
| Triphenyl phosphate                   | 0.016 | 0.041              | 0.026              | 0.056            | 0.032            | 0.071                    | <LOD                     | 0.037                    |                   |                 |
| Tris(1,3-Dichloro-2-propyl) phosphate | 0.904 | <LOD               | <LOD               | 0.69             | 0.289            | 6.564                    | 6.138                    | 5.47                     | 5.80              | 8.1             |
| Tris(1-chloro-2-propyl)phosphate      | 0.206 | <LOD               | <LOD               | 0.288            | 0.078            | 1.828                    | 1.799                    | 1.516                    | 1.66              | 12.1            |

a- We present the field/solvent blanks and technical replicates on the  $\mu\text{g/L}$  scale because the field and solvent blanks did not have air passed over them like the technical replicates.

b-Arithmetic average when three detectable values were available.

c-Coefficient of variation calculated as standard deviation / arithmetic average x 100, when three detectable values are available.

Supplemental Table 7: Recovery of SVOCs analytes from standards spiked into an XAD and PUF sample (n=5).

| SVOC                        | Expected concentration (µg/L) | Detected Concentrations            |                                       |                                       | Percent Recovery           |                          |                                    |
|-----------------------------|-------------------------------|------------------------------------|---------------------------------------|---------------------------------------|----------------------------|--------------------------|------------------------------------|
|                             |                               | Mean detected concentration (µg/L) | Minimum detected concentration (µg/L) | Maximum detected concentration (µg/L) | Average Recovery (n=5) (%) | Standard Deviation (n=5) | Confidence Interval (α=0.05) (n=5) |
| BDE 100                     | 6.31                          | 5.92                               | 4.87                                  | 6.81                                  | 93.8                       | 11.1                     | 13.8                               |
| BDE 47                      | 6.31                          | 5.41                               | 4.01                                  | 7.29                                  | 85.7                       | 21.1                     | 26.2                               |
| BDE 99                      | 6.31                          | 5.83                               | 5.30                                  | 6.53                                  | 92.3                       | 9.38                     | 11.7                               |
| Benzophenone                | 6.31                          | 5.63                               | 4.16                                  | 6.91                                  | 89.2                       | 17.9                     | 22.2                               |
| Benzophenone-3              | 6.31                          | 5.64                               | 3.81                                  | 7.21                                  | 89.3                       | 19.3                     | 23.9                               |
| Benzyl butyl phthalate      | 12.63                         | 10.40                              | 5.67                                  | 12.86                                 | 82.4                       | 23.6                     | 29.3                               |
| Bis(2-ethylhexyl) adipate   | 12.63                         | 11.04                              | 8.28                                  | 12.78                                 | 87.5                       | 15.5                     | 19.3                               |
| Bis(2-ethylhexyl) phthalate | 2.53                          | 2.51                               | 1.65                                  | 3.44                                  | 99.4                       | 28.6                     | 35.5                               |
| Dibutyl phthalate           | 6.31                          | 5.63                               | 4.39                                  | 6.61                                  | 89.2                       | 14.3                     | 17.8                               |
| Dicyclohexyl phthalate      | 12.63                         | 10.83                              | 7.08                                  | 13.02                                 | 85.7                       | 19.8                     | 24.6                               |
| Diethyl Phthalate           | 12.63                         | 10.10                              | 4.37                                  | 13.05                                 | 80.0                       | 27.6                     | 34.2                               |
| Dihexyl phthalate           | 2.53                          | 2.35                               | 1.81                                  | 2.92                                  | 93.2                       | 19.3                     | 23.9                               |
| Diisobutyl phthalate        | 30.30                         | 26.78                              | 21.05                                 | 30.90                                 | 88.4                       | 15.2                     | 18.9                               |
| Diisononyl phthalate        | 12.63                         | 12.02                              | 10.88                                 | 13.04                                 | 95.2                       | 6.35                     | 7.89                               |
| Dimethyl phthalate          | 6.31                          | 5.90                               | 3.62                                  | 7.25                                  | 93.5                       | 22.5                     | 27.9                               |
| Di-n-octyl phthalate        | 2.53                          | 2.75                               | 2.10                                  | 3.96                                  | 109                        | 28.5                     | 35.4                               |
| Di-n-pentyl phthalate       | 12.63                         | 11.81                              | 8.80                                  | 13.52                                 | 93.6                       | 14.9                     | 18.5                               |
| Galaxolide/Tonalid          | 12.63                         | 11.51                              | 8.03                                  | 12.94                                 | 91.2                       | 15.9                     | 19.8                               |
| PCB 105                     | 6.63                          | 6.30                               | 5.20                                  | 7.02                                  | 95.1                       | 10.1                     | 12.5                               |
| PCB 153                     | 6.63                          | 6.30                               | 4.58                                  | 7.14                                  | 95.1                       | 15.6                     | 19.4                               |
| PCB 52                      | 6.63                          | 6.42                               | 5.82                                  | 6.80                                  | 96.8                       | 5.43                     | 6.75                               |
| TCEP                        | 6.31                          | 5.63                               | 3.83                                  | 6.36                                  | 89.2                       | 16.2                     | 20.1                               |
| TPP                         | 6.31                          | 5.71                               | 4.65                                  | 6.35                                  | 90.4                       | 10.2                     | 12.6                               |
| TDCPP                       | 6.31                          | 5.55                               | 4.34                                  | 7.15                                  | 87.9                       | 17.7                     | 21.9                               |
| TCPP                        | 6.31                          | 6.00                               | 4.72                                  | 7.05                                  | 95                         | 13.6                     | 16.8                               |



Supplemental Table 8: Recovery of PFAS analytes from standards spiked into an XAD and PUF sample (n=5).

| PFAS         | Detected Concentrations      |                                   |                                      | Percent Recovery                     |                            | Confidence Interval ( $\alpha=0.05$ ) (n=5) |                          |
|--------------|------------------------------|-----------------------------------|--------------------------------------|--------------------------------------|----------------------------|---------------------------------------------|--------------------------|
|              | Expected concentration (ppb) | Mean detected concentration (ppb) | Minimum detected concentration (ppb) | Maximum detected concentration (ppb) | Average Recovery (n=5) (%) |                                             | Standard Deviation (n=5) |
| 11Cl-PF3OUdS | 10.00                        | 9.85                              | 8.83                                 | 10.90                                | 101.                       | 10.0                                        | 12.5                     |
| 3:3 FTCA     | 10.00                        | 7.15                              | 6.62                                 | 8.83                                 | 72.8                       | 9.49                                        | 11.8                     |
| 4:2-FTS      | 10.00                        | 8.44                              | 7.55                                 | 10.14                                | 86.2                       | 11.4                                        | 14.2                     |
| 5:3 FTCA     | 10.00                        | 7.15                              | 6.02                                 | 9.88                                 | 70.8                       | 16.3                                        | 20.2                     |
| 6:2-FTS      | 10.00                        | 7.56                              | 6.14                                 | 8.19                                 | 74.1                       | 9.17                                        | 11.4                     |
| 7:3 FTCA     | 10.00                        | 8.55                              | 7.35                                 | 9.03                                 | 85.1                       | 6.86                                        | 8.52                     |
| 8:2-FTS      | 10.00                        | 9.20                              | 6.47                                 | 10.82                                | 90.1                       | 16.8                                        | 20.9                     |
| 9Cl-PF3ONS   | 10.00                        | 8.16                              | 6.64                                 | 9.81                                 | 77.5                       | 15.4                                        | 19.1                     |
| ADONA        | 10.00                        | 7.80                              | 5.19                                 | 10.27                                | 71.8                       | 23.8                                        | 29.5                     |
| FBSA         | 10.00                        | 8.21                              | 6.07                                 | 9.87                                 | 87.4                       | 19.6                                        | 24.3                     |
| FHxSA        | 10.00                        | 7.58                              | 4.52                                 | 9.54                                 | 70.9                       | 21.3                                        | 26.5                     |
| HFPODA-GenX  | 10.00                        | 7.29                              | 5.81                                 | 8.07                                 | 71.6                       | 9.29                                        | 11.5                     |
| NEtFOSA      | 10.00                        | 7.10                              | 6.54                                 | 8.19                                 | 71.6                       | 6.35                                        | 7.89                     |
| NEtFOSAA     | 10.00                        | 10.51                             | 8.59                                 | 13.11                                | 110                        | 21.4                                        | 26.6                     |
| NEtFOSE      | 10.00                        | 10.03                             | 9.17                                 | 10.98                                | 100                        | 6.81                                        | 8.46                     |
| NFDHA        | 10.00                        | 7.28                              | 5.43                                 | 8.51                                 | 74.5                       | 14.4                                        | 17.8                     |
| NMeFOSA      | 10.00                        | 7.43                              | 6.13                                 | 8.10                                 | 74.0                       | 7.65                                        | 9.50                     |
| NMeFOSAA     | 10.00                        | 9.93                              | 7.55                                 | 12.90                                | 105                        | 26.0                                        | 32.3                     |
| NMeFOSE      | 10.00                        | 8.85                              | 7.16                                 | 9.94                                 | 85.8                       | 12.0                                        | 15.0                     |
| PFBA         | 10.00                        | 9.10                              | 7.10                                 | 9.81                                 | 89.7                       | 11.3                                        | 14.0                     |
| PFBS         | 10.00                        | 8.42                              | 7.93                                 | 10.00                                | 85.4                       | 8.92                                        | 11.1                     |
| PFDA         | 10.00                        | 8.82                              | 7.39                                 | 10.14                                | 89.2                       | 11.9                                        | 14.8                     |
| PFDoA        | 10.00                        | 8.15                              | 6.95                                 | 11.00                                | 81.9                       | 16.4                                        | 20.4                     |
| PFDoS        | 10.00                        | 8.24                              | 6.68                                 | 9.03                                 | 82.9                       | 9.47                                        | 11.8                     |
| PFDS         | 10.00                        | 9.65                              | 8.71                                 | 10.93                                | 98.5                       | 9.06                                        | 11.2                     |
| PFHpA        | 10.00                        | 9.53                              | 7.02                                 | 11.35                                | 90.7                       | 18.4                                        | 22.9                     |
| PFHpS        | 10.00                        | 9.19                              | 8.17                                 | 10.57                                | 91.1                       | 10.3                                        | 12.8                     |
| PFHxA        | 10.00                        | 9.51                              | 8.44                                 | 10.69                                | 97.5                       | 10.7                                        | 13.3                     |
| PFHxS        | 10.00                        | 9.52                              | 8.77                                 | 9.83                                 | 94.4                       | 4.55                                        | 5.65                     |
| PFMBA        | 10.00                        | 7.60                              | 6.56                                 | 8.54                                 | 75.7                       | 7.17                                        | 8.90                     |
| PFMPA        | 10.00                        | 8.04                              | 7.75                                 | 8.29                                 | 81.1                       | 2.73                                        | 3.39                     |

|        |       |      |      |       |      |      |      |
|--------|-------|------|------|-------|------|------|------|
| PFNA   | 10.00 | 9.38 | 8.19 | 10.00 | 92.9 | 7.39 | 9.18 |
| PFNS   | 10.00 | 9.95 | 8.87 | 11.74 | 102  | 12.0 | 14.9 |
| PFOA   | 10.00 | 9.07 | 7.92 | 9.79  | 90.1 | 7.01 | 8.70 |
| PFOS   | 10.00 | 9.30 | 8.21 | 10.38 | 95.7 | 10.2 | 12.6 |
| PFOSA  | 10.00 | 7.61 | 5.36 | 10.56 | 75.1 | 20.4 | 25.3 |
| PFPeA  | 10.00 | 9.19 | 7.97 | 10.94 | 95.0 | 13.3 | 16.5 |
| PFPeS  | 10.00 | 9.26 | 7.33 | 11.44 | 87.2 | 18.0 | 22.3 |
| PFTeDA | 10.00 | 8.81 | 7.59 | 9.59  | 91.1 | 7.86 | 9.76 |
| PFTrDA | 10.00 | 8.42 | 7.08 | 10.38 | 85.3 | 12.3 | 15.3 |
| PFUnA  | 10.00 | 9.10 | 8.01 | 9.82  | 89.3 | 9.59 | 11.9 |

---

Supplemental Table 9: PFAS concentrations (ng PFAS/g of filter) on unused and used box air filter pieces (location of piece from filter noted).<sup>a</sup>

|              | Unused<br>(Top) | Unused<br>(Middle) | Unused<br>(Bottom) | Average | Used<br>(Right) | Used<br>(Front) | Used<br>(Left) | Average <sup>b</sup> |
|--------------|-----------------|--------------------|--------------------|---------|-----------------|-----------------|----------------|----------------------|
| 11Cl-PF3OUdS | <LOD            | <LOD               | <LOD               |         | 0.022           | <LOD            | <LOD           |                      |
| 3:3 FTCA     | 17.948          | 21.790             | 21.574             | 20.437  | 333.839         | 219.353         | 212.830        | 255.34               |
| 4:2-FTS      | 0.022           | 0.025              | 0.026              | 0.025   | 0.029           | 0.023           | <LOD           |                      |
| 5:3 FTCA     | 47.503          | 45.671             | 46.985             | 46.72   | 51.033          | 35.153          | 44.247         | 43.478               |
| 6:2-FTS      | 0.221           | <LOD               | <LOD               |         | <LOD            | <LOD            | 0.238          |                      |
| 7:3 FTCA     | <LOD            | <LOD               | <LOD               |         | <LOD            | <LOD            | <LOD           |                      |
| 8:2-FTS      | 0.754           | 0.902              | 1.039              | 0.898   | <LOD            | <LOD            | 0.246          |                      |
| 9Cl-PF3ONS   | <LOD            | <LOD               | <LOD               |         | <LOD            | <LOD            | <LOD           |                      |
| ADONA        | 0.037           | 0.088              | <LOD               |         | 0.033           | 0.117           | <LOD           |                      |
| FBSA         | 96.102          | 117.239            | 122.759            | 112.033 | 134.697         | 88.636          | 99.568         | 107.634              |
| FHxSA        | <LOD            | 0.004              | <LOD               |         | 0.049           | <LOD            | <LOD           |                      |
| HFPODA-GenX  | <LOD            | <LOD               | <LOD               |         | <LOD            | <LOD            | <LOD           |                      |
| NEtFOSA      | 0.086           | 0.187              | <LOD               |         | <LOD            | <LOD            | 0.026          |                      |
| NEtFOSAA     | <LOD            | 0.027              | <LOD               |         | <LOD            | <LOD            | 0.059          |                      |
| NEtFOSE      | 51.045          | 35.110             | 35.074             | 40.41   | 34.029          | 18.460          | 33.352         | 28.613               |
| NFDHA        | <LOD            | <LOD               | <LOD               |         | <LOD            | <LOD            | <LOD           |                      |
| NMeFOSA      | <LOD            | <LOD               | <LOD               |         | <LOD            | <LOD            | <LOD           |                      |
| NMeFOSAA     | 12.547          | 15.980             | 17.667             | 15.398  | 53.805          | 19.956          | 30.164         | 34.642               |
| NMeFOSE      | 8.772           | 0.456              | 8.048              | 5.759   | 1.100           | 0.787           | 0.540          | 0.809                |
| PFBA         | <LOD            | <LOD               | <LOD               |         | <LOD            | <LOD            | <LOD           |                      |
| PFBS         | 0.015           | 0.013              | 0.018              | 0.015   | 257.099         | 224.410         | 175.895        | 219.135              |
| PFDA         | <LOD            | <LOD               | 0.282              |         | <LOD            | 0.249           | 0.166          |                      |
| PFDoA        | 0.017           | <LOD               | <LOD               |         | <LOD            | <LOD            | <LOD           |                      |
| PFDoS        | 0.037           | <LOD               | <LOD               |         | 0.009           | 0.035           | 0.095          | 0.046                |
| PFDS         | <LOD            | <LOD               | <LOD               |         | <LOD            | <LOD            | 0.048          |                      |
| PFEEESA      | <LOD            | 0.003              | <LOD               |         | <LOD            | <LOD            | <LOD           |                      |
| PFHpA        | 0.076           | 0.065              | 0.028              | 0.056   | 0.067           | 0.057           | 0.039          | 0.054                |
| PFHpS        | <LOD            | <LOD               | 0.025              |         | <LOD            | <LOD            | 0.013          |                      |
| PFHxA        | 0.318           | 0.593              | 0.450              | 0.454   | 3.757           | 2.017           | 3.593          | 3.122                |
| PFHxS        | 0.890           | 1.067              | 1.714              | 1.224   | 2.059           | 1.055           | 2.085          | 1.733                |
| PFMBA        | 0.038           | <LOD               | <LOD               |         | 20.049          | 10.403          | 11.878         | 14.11                |
| PFMPA        | <LOD            | <LOD               | <LOD               |         | 27.356          | 11.417          | 11.153         | 16.642               |

|         | Unused<br>(Top) | Unused<br>(Middle) | Unused<br>(Bottom) | Average | Used<br>(Right) | Used<br>(Front) | Used<br>(Left) | Average <sup>b</sup> |
|---------|-----------------|--------------------|--------------------|---------|-----------------|-----------------|----------------|----------------------|
| PFNA    | <LOD            | <LOD               | 0.006              |         | 0.004           | 0.005           | 0.434          | 0.148                |
| PFNS    | <LOD            | 0.015              | 0.007              |         | <LOD            | <LOD            | <LOD           |                      |
| PFOA    | 0.346           | 0.308              | 0.156              | 0.27    | 1.422           | 0.753           | 1.261          | 1.145                |
| PFOS    | 0.127           | 0.157              | 0.124              | 0.136   | 1.412           | 1.218           | 1.298          | 1.309                |
| PFOSA   | <LOD            | 0.024              | 0.108              |         | <LOD            | 0.033           | 0.033          |                      |
| PFPeA   | 1.906           | <LOD               | 3.221              |         | 669.649         | 361.338         | 489.647        | 506.878              |
| PFPeS   | <LOD            | <LOD               | <LOD               |         | <LOD            | <LOD            | <LOD           |                      |
| PFTeDA  | <LOD            | <LOD               | <LOD               |         | <LOD            | <LOD            | 0.008          |                      |
| PFTTrDA | <LOD            | <LOD               | <LOD               |         | <LOD            | <LOD            | <LOD           |                      |
| PFUnA   | <LOD            | 0.189              | <LOD               |         | 0.273           | <LOD            | <LOD           |                      |

a-Unused concentrations are from a single filter. Used concentrations are from three filters that were part of one CR Box.

b-Average only calculated when PFAS was detected on all three filter samples.

Supplemental Table 10: SVOC concentrations (ng chemical/g of filter) on unused and used box air filter pieces (location of piece from filter noted).<sup>a</sup>

| <b>Chemical</b> | <b>Unused<br/>(Top)</b> | <b>Unused<br/>(Middle)</b> | <b>Unused<br/>(Bottom)</b> | <b>Average</b> | <b>Used<br/>(Right)</b> | <b>Used<br/>(Front)</b> | <b>Used<br/>(Left)</b> | <b>Average<sup>b</sup></b> |
|-----------------|-------------------------|----------------------------|----------------------------|----------------|-------------------------|-------------------------|------------------------|----------------------------|
| BDE 47          | <LOD                    | 0.16                       | <LOD                       |                | 63.03                   | 32.59                   | 39.06                  | 44.89                      |
| BDE 99          | <LOD                    | <LOD                       | <LOD                       |                | 1.49                    | 0.62                    | 1.03                   | 1.05                       |
| BDE 100         | <LOD                    | <LOD                       | <LOD                       |                | 11.06                   | 6.18                    | 7.10                   | 8.11                       |
| BP              | 0.00                    | 1.23                       | 0.72                       | 0.65           | 2.14                    | 1.88                    | 1.87                   | 1.97                       |
| BP3             | 18.74                   | 16.65                      | 22.84                      | 19.41          | 45.36                   | 23.62                   | 30.26                  | 33.08                      |
| BBzP            | 2.70                    | <LOD                       | <LOD                       |                | 276.00                  | 124.61                  | 200.24                 | 200.28                     |
| DEHA            | 5.56                    | 12.59                      | 9.29                       | 9.15           | 436.97                  | 222.59                  | 305.56                 | 321.71                     |
| DEHP            | 12.35                   | 9.54                       | 5.60                       | 9.17           | 11984.97                | 7298.55                 | 8977.48                | 9420.33                    |
| DnBP            | 40.76                   | 83.89                      | 65.22                      | 63.29          | 1011.48                 | 761.17                  | 700.58                 | 824.41                     |
| DCHP            | 101.08                  | 78.21                      | 43.66                      | 74.32          | 1456.55                 | 711.60                  | 992.30                 | 1053.48                    |
| DEP             | 113.94                  | 234.04                     | 143.03                     | 163.67         | 908.80                  | 392.17                  | 525.80                 | 608.92                     |
| DHP             | <LOD                    | <LOD                       | <LOD                       |                | 1.30                    | 3.47                    | 3.43                   | 2.73                       |
| DiBP            | 145.76                  | 239.54                     | 189.17                     | 191.49         | 1893.91                 | 1390.16                 | 1312.55                | 1532.21                    |
| DiNP            | 4.25                    | <LOD                       | <LOD                       |                | <LOD                    | <LOD                    | <LOD                   |                            |
| DMP             | 3.23                    | 6.53                       | 6.58                       | 5.44           | 17.57                   | 12.14                   | 15.45                  | 15.05                      |
| DnOP            | 25.01                   | 27.09                      | 18.15                      | 23.41          | 333.05                  | 199.91                  | 116.83                 | 216.60                     |
| DNPP            | 40.76                   | 83.89                      | 65.22                      | 63.29          | 1330.91                 | 761.17                  | 1220.91                | 1104.33                    |
| Gal/Ton         | 0.43                    | 0.92                       | 0.58                       | 0.64           | 3.27                    | 2.22                    | 2.76                   | 2.75                       |
| PCB 52          | 0.24                    | 0.04                       | <LOD                       |                | 0.47                    | 0.27                    | 0.03                   | 0.26                       |
| PCB 105         | <LOD                    | <LOD                       | <LOD                       |                | <LOD                    | <LOD                    | <LOD                   |                            |
| PCB 153         | 0.06                    | 0.18                       | <LOD                       |                | <LOD                    | <LOD                    | <LOD                   |                            |
| TCEP            | 1.58                    | 3.71                       | 1.90                       | 2.40           | 13.72                   | 13.84                   | 10.88                  | 12.81                      |
| TPP             | 0.84                    | 2.20                       | 0.26                       | 1.10           | 435.81                  | 304.10                  | 392.76                 | 377.56                     |
| TDCPP           | 3.34                    | 9.17                       | 2.73                       | 5.08           | 159.40                  | 111.89                  | 126.06                 | 132.45                     |
| TCPP            | 24.26                   | 49.14                      | 38.10                      | 37.17          | 252.82                  | 177.11                  | 175.39                 | 201.77                     |

a-Unused concentrations are from a single filter. Used concentrations are from three filters that were part of one CR Box.

b-Average only calculated when PFAS was detected on all three filter samples.

Supplemental Figure 1: Representative image of an assembled Corsi-Rosenthal box used in the intervention study.

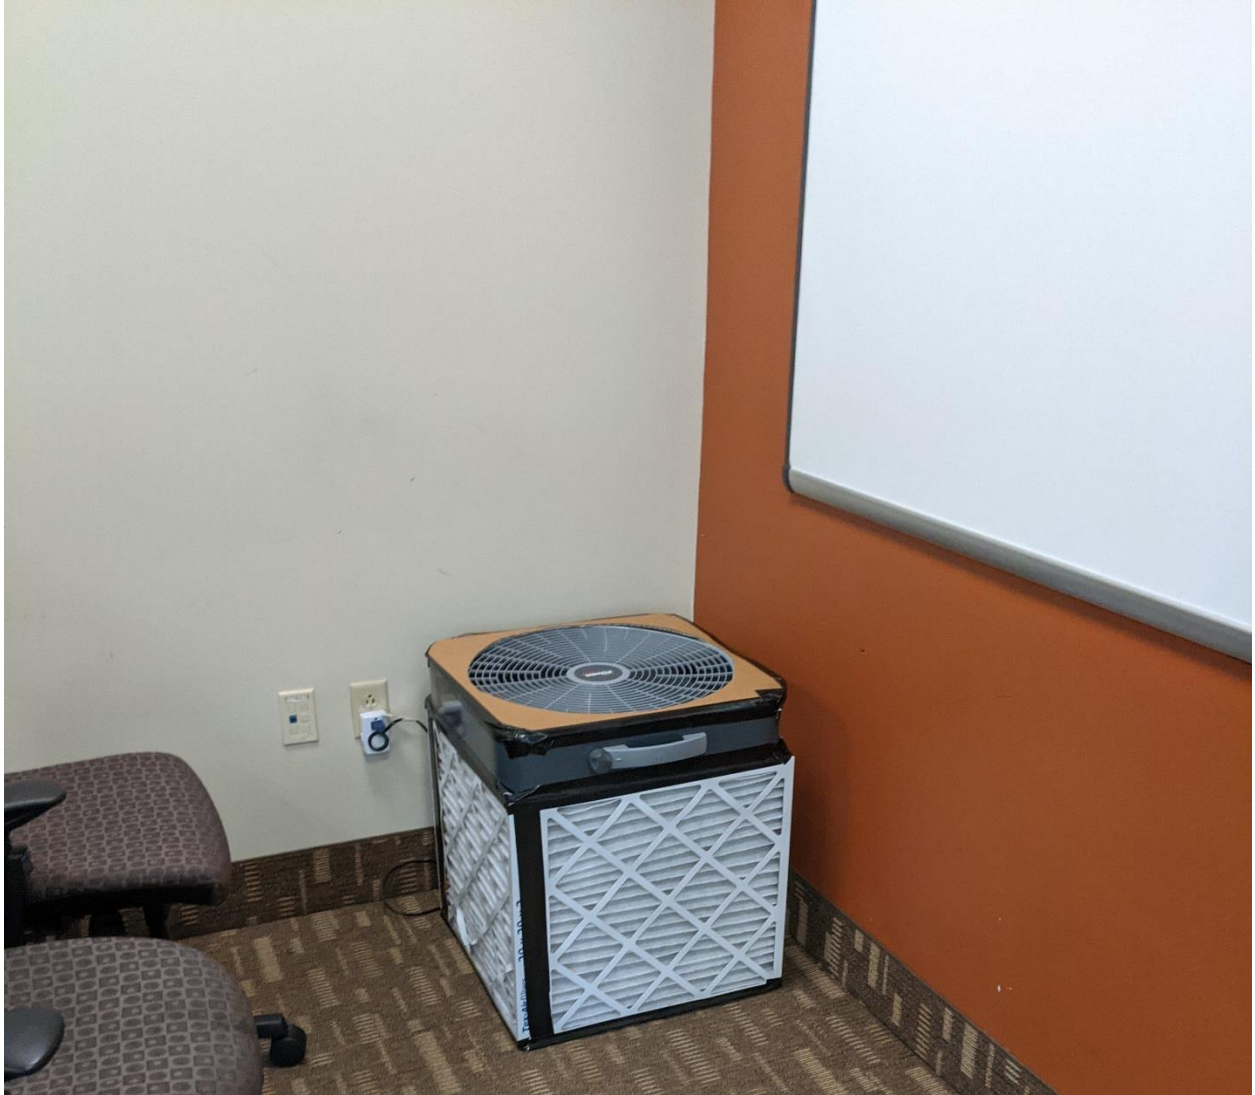

Supplemental Figure 2: Representative image of disassembled (Left) and assembled (Right) SVOC sampling devices.

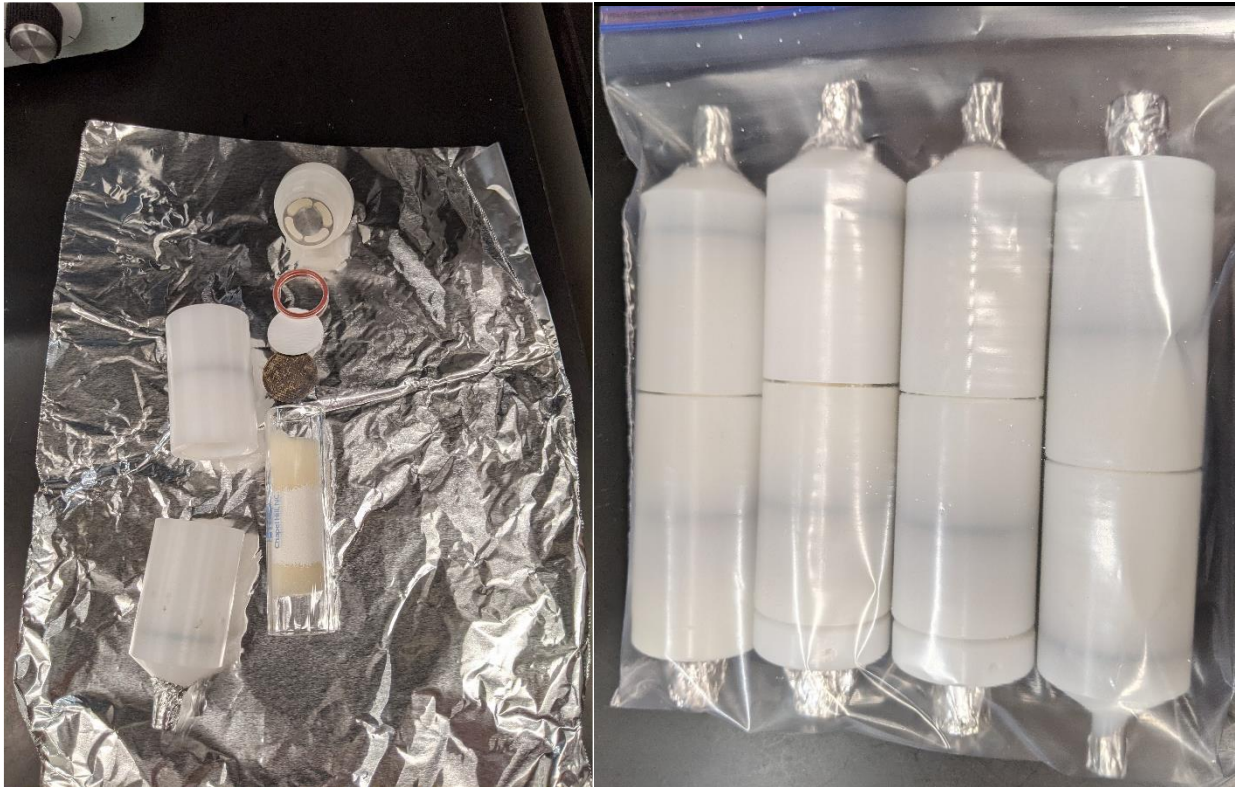

Supplemental Figure 3: Representative image of air sampling device.

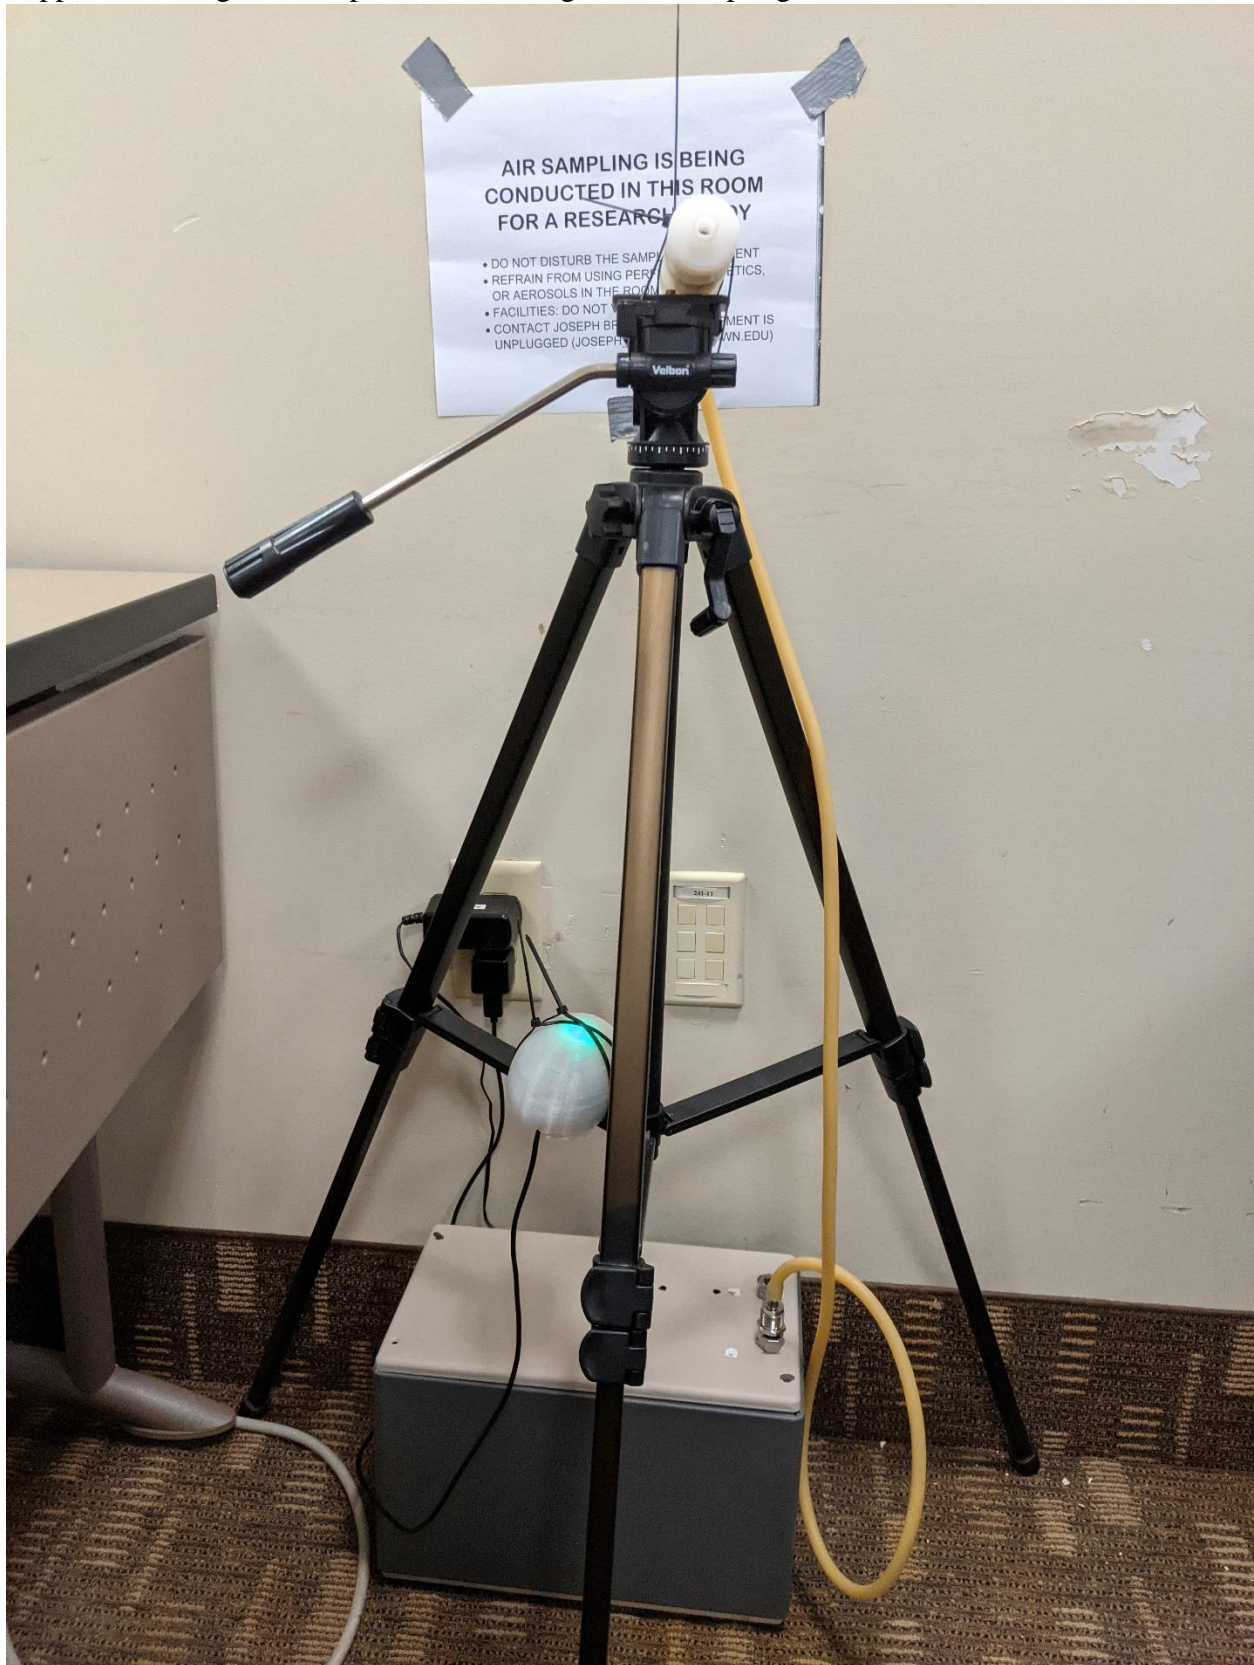



Supplemental Figure 4: PFAS concentrations (ng/L or ppt) in solvent extracts, field blanks, and field sample extracts.

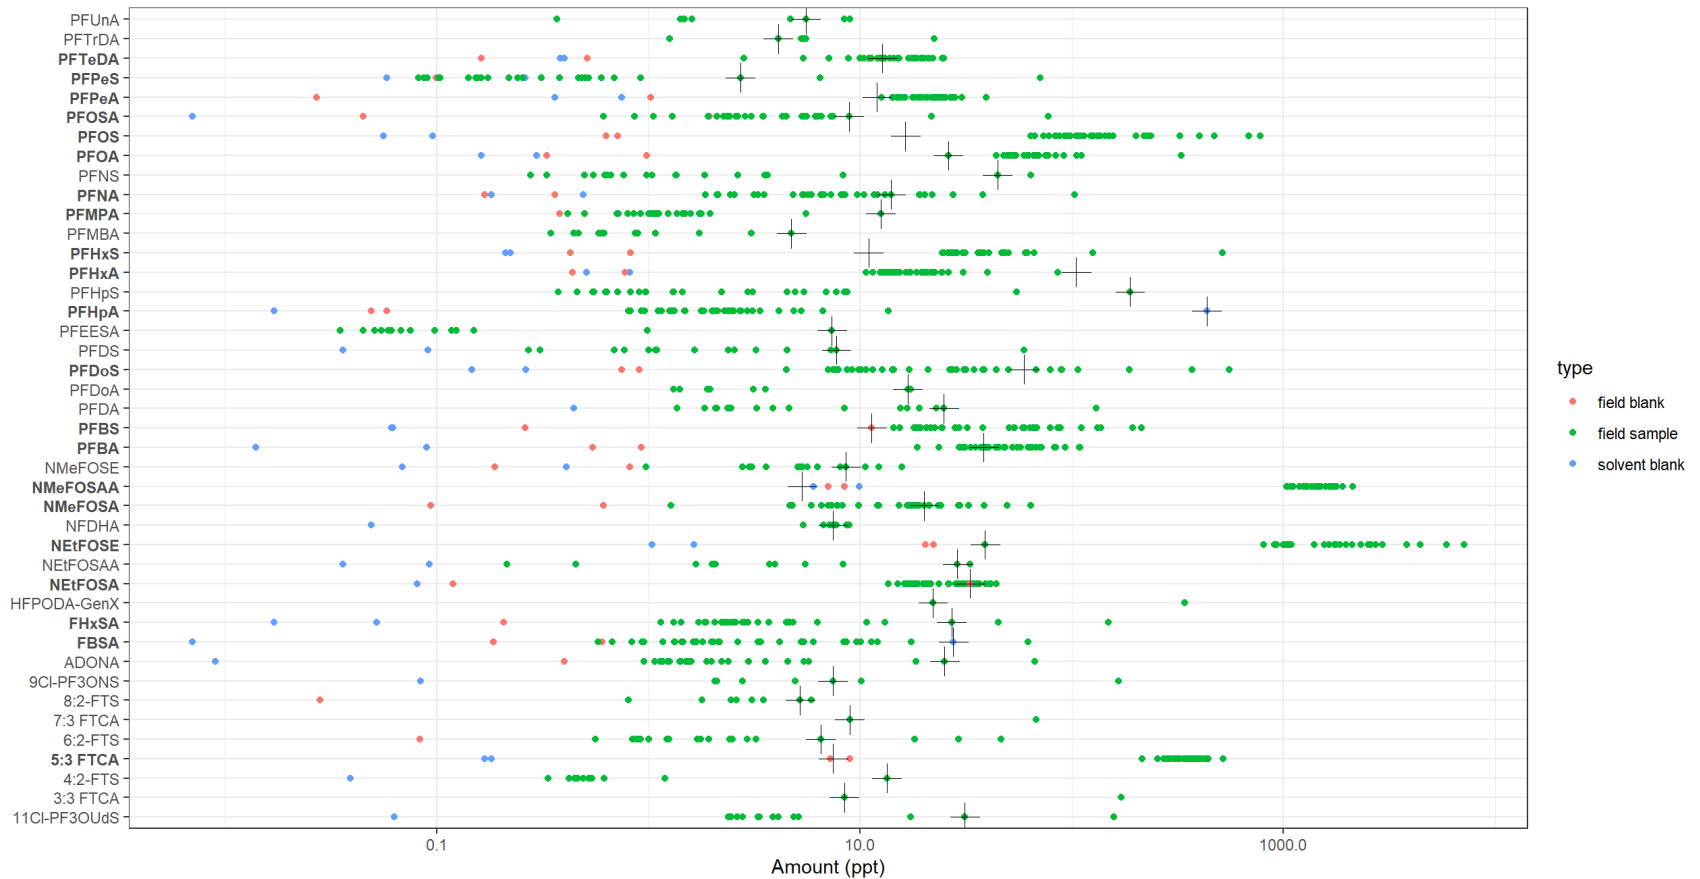

Limits of Detection represented by black plus sign. Compounds in bold had >80% detection frequency and included in primary analysis of the intervention.

Supplemental Figure 5: SVOC concentrations ( $\mu\text{g/L}$  or ppb) in solvent extracts, field blanks, and field sample extracts.

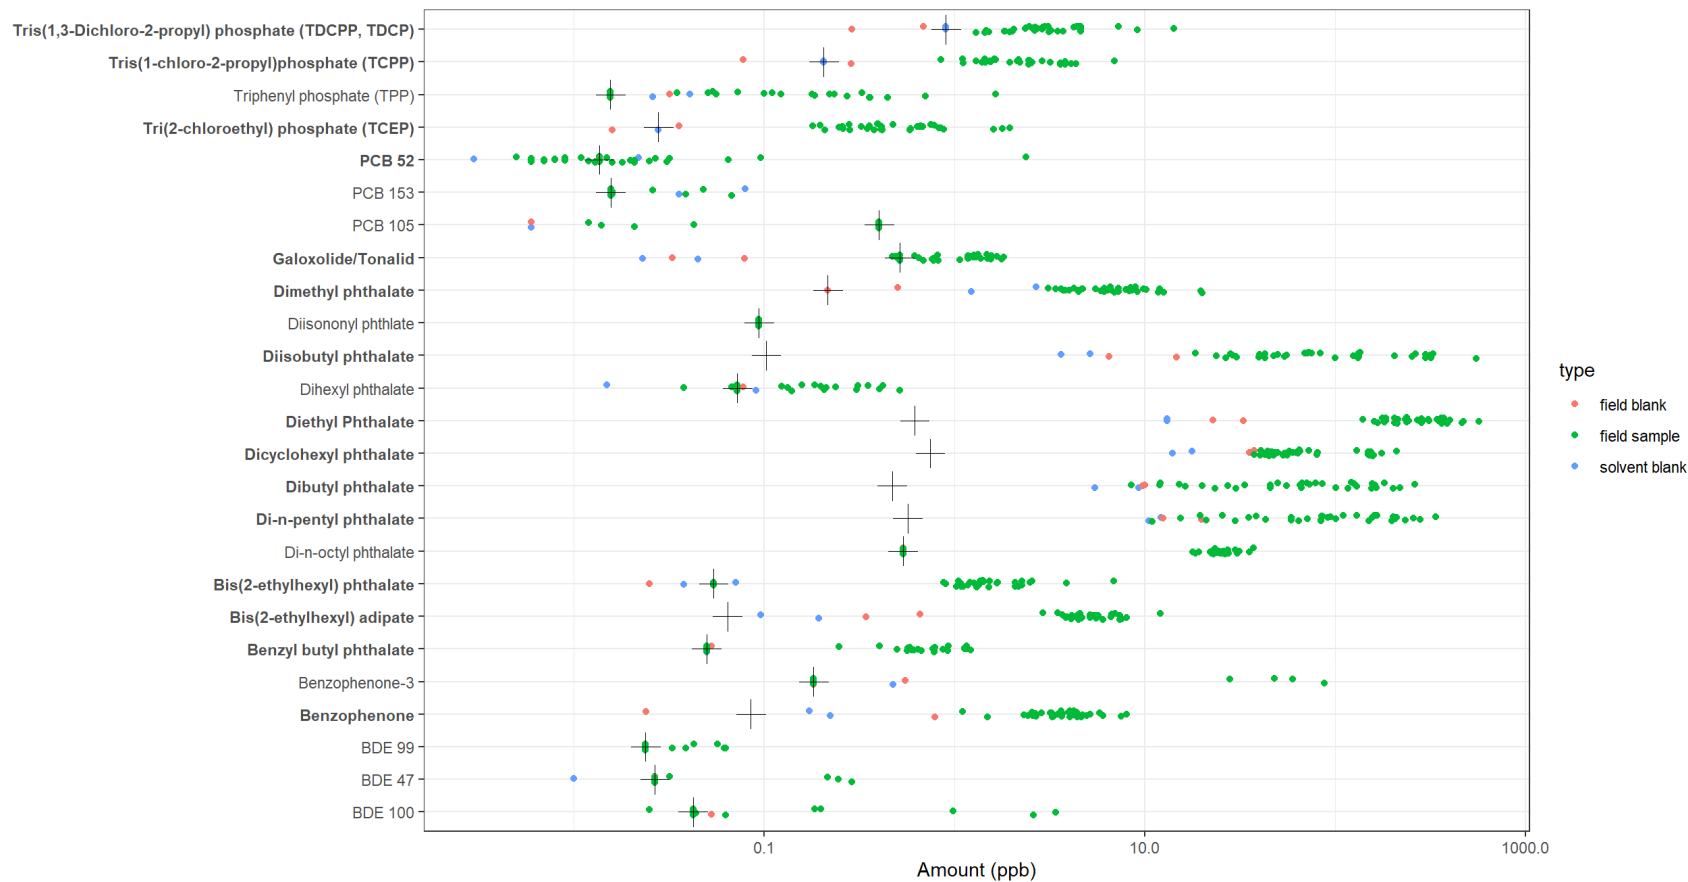

Limits of Detection represented by black plus sign. Compounds in bold had >80% detection frequency and included in primary analysis of the intervention.

Supplemental Figure 6. Associations of log- $K_{oa}$  and molecular weight with change in room phthalate and PFAS air concentrations before vs. during the intervention<sup>a</sup>

A) Phthalate & log- $K_{oa}$

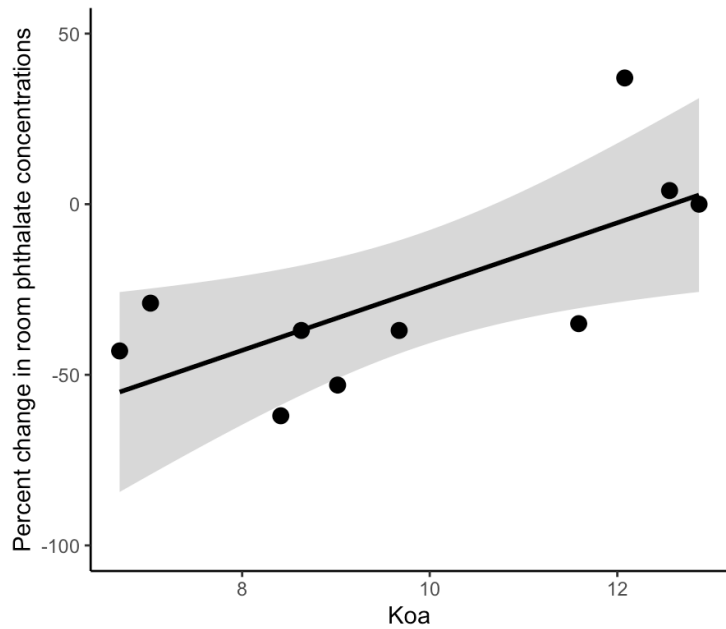

B) Phthalate & Molecular Weight

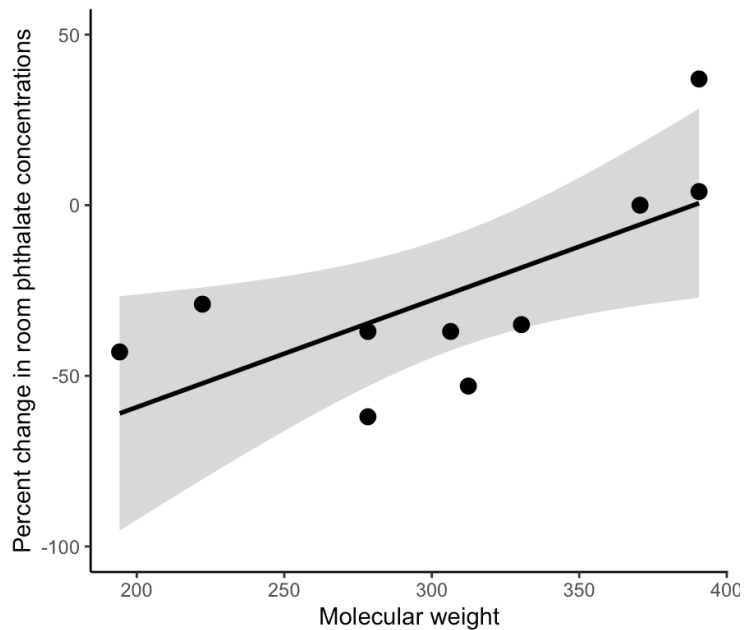

C) PFAS & log-K<sub>oa</sub>

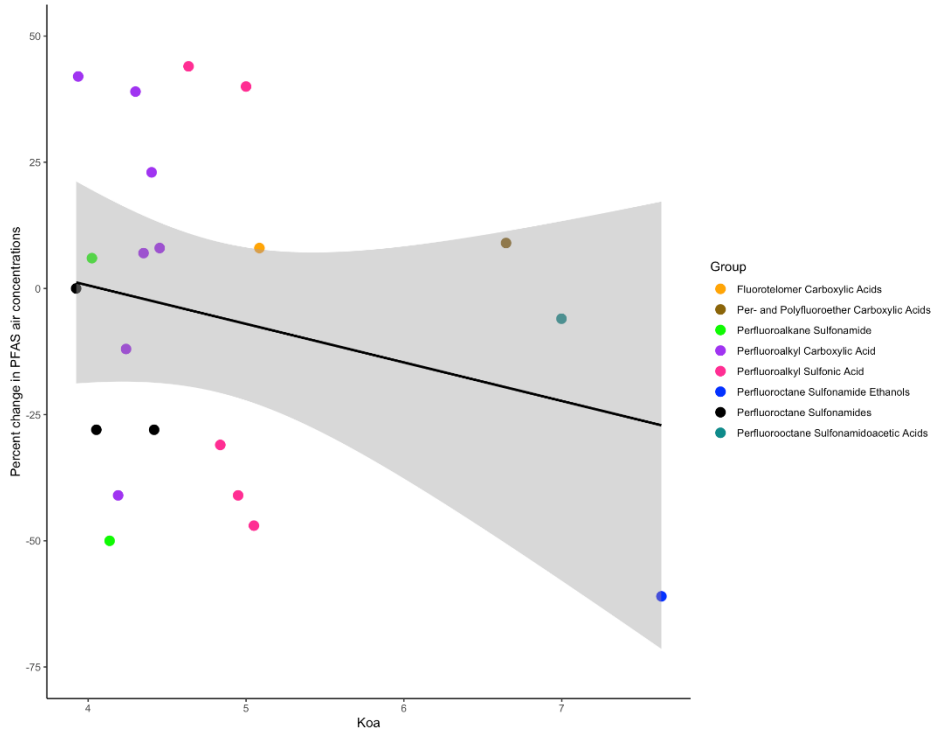

D) PFAS & Molecular Weight

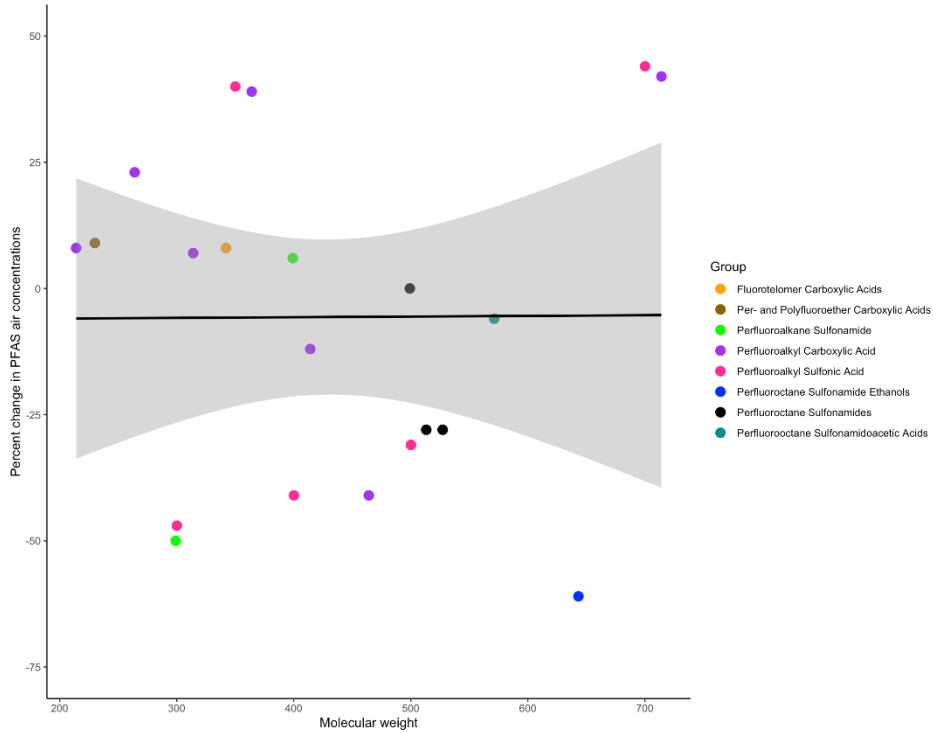

a-The estimate (y-axis) is the percent change in air PFAS or SVOC concentrations during vs. before the intervention.

## Instructions for Supplemental Files – Interactive Plots

Each of the four Supplemental Files shows room-specific changes in each SVOC presented as a ratio on the y-axis where the ratio is the during intervention concentration divided by the before intervention concentration. Ratios  $<1$  indicate that the chemical concentration declined during the intervention. The rooms are sorted from smallest to largest area (left to right).

Four files are provided to ease interpretation. Supplemental Files 1 and 4 show these for individual PFAS and phthalates, respectively. Supplemental Files 2 and 3 show all the chemicals, with labels for each individual chemical or classes of chemicals, respectively.

To open a file, **double click** on the .html file below to open it in a web browser. Individual chemicals (or classes) can be displayed by double-clicking on the name of the chemical (or class) in the legend. Additional chemicals (or classes) can be displayed by single-clicking another chemical or class in the legend. Individual chemicals (or classes) can be suppressed by single-clicking on their name in the legend. The red line is the reference line, with

Hovering over an individual data point provides additional information in a pop-up box. This includes the room number, room-specific changes in SVOC concentrations, chemical name, number of occupants, number of electronics, number of windows, room area, and chemical class. Zoom, pan, axis rescaling, and image exporting functions are available in the upper right corner.

### Figure Footnotes

a-For full names of chemicals, see Supplemental Table 2.

b-Room-specific change presented as a ratio on the y-axis with the during intervention concentration divided by the before intervention concentration. Ratios  $<1$  indicate that the chemical concentration declined during the intervention. The red line indicates a ratio of 1.
